# Supplementary material for: Spectroscopy and potential energy surface of the H2–CO2van der Waals complex: experimental and theoretical studies
Source: Royal Society of Chemistry journal article supplement (doi:10.1039/b614849b), 2006-12-12
Supplement: b614849b.pdf [file b614849b.pdf]

Table S1. Rovibrational energy levels with  $J \leq 4$  of *para*H<sub>2</sub>-CO<sub>2</sub> for CO<sub>2</sub> in its vibrational ground state. Energies are given in cm<sup>-1</sup>.

| <b>J</b> | <b>Even +1</b> | <b>Even -1</b> | <b>Odd +1</b> | <b>Odd -1</b> |
|----------|----------------|----------------|---------------|---------------|
| <b>0</b> | -50.383 (000)  |                | -28.316       |               |
|          | -23.544        |                | -20.235       |               |
|          | -15.116        |                | -7.107        |               |
|          | -3.335         |                |               |               |
| <b>1</b> | -26.838        | -49.385(111)   | -49.230(110)  | -49.727(101)  |
|          | -14.373        | -27.545        | -20.313       | -27.241       |
|          |                | -21.927        | -8.371        | -22.354       |
|          |                | -17.805        | -0.594        | -17.186       |
|          |                | -10.884        |               | -11.607       |
|          |                | -4.297         |               | -3.863        |
|          |                | -0.647         |               | -0.291        |
| <b>2</b> | -48.456(202)   | -47.768(211)   | -48.232(212)  | -46.747(221)  |
|          | -46.706(220)   | -24.380        | -26.100       | -25.192       |
|          | -26.257        | -18.114        | -24.507       | -17.335       |
|          | -20.131        | -10.474        | -21.069       | -11.298       |
|          | -18.961        | -4.230         | -14.659       | -3.602        |
|          | -14.967        |                | -13.081       |               |
|          | -7.891         |                | -6.898        |               |
|          | -5.935         |                | -1.950        |               |
| <b>3</b> | -44.804(322)   | -46.523(313)   | -45.604(312)  | -46.638(303)  |
|          | -22.747        | -42.702(331)   | -42.695(330)  | -44.616(321)  |
|          | -20.607        | -24.355        | -22.637       | -24.615       |
|          | -15.180        | -22.675        | -14.995       | -20.934       |
|          | -7.513         | -19.001        | -13.155       | -18.157       |
|          | -5.441         | -14.900        | -7.661        | -16.974       |
|          |                | -10.979        | -0.597        | -11.856       |
|          |                | -10.462        |               | -8.302        |
|          |                | -3.182         |               | -3.252        |
|          |                | -1.531         |               | -2.146        |

Table S1. continued.

| <b>J</b> | <b>Even +1</b> | <b>Even -1</b> | <b>Odd +1</b> | <b>Odd -1</b> |
|----------|----------------|----------------|---------------|---------------|
| <b>4</b> | -44.324(404)   | -42.782(413)   | -44.278(414)  | -42.238(423)  |
|          | -41.745(422)   | -40.047(431)   | -40.093(432)  | -37.245(441)  |
|          | -37.244(440)   | -20.143        | -22.434       | -19.651       |
|          | -22.331        | -15.762        | -19.614       | -18.682       |
|          | -19.768        | -11.049        | -16.386       | -12.065       |
|          | -16.018        | -10.862        | -15.863       | -7.957        |
|          | -13.006        | -3.851         | -13.804       | -3.207        |
|          | -9.870         | -0.144         | -7.574        | -2.222        |
|          | -7.869         |                | -5.955        |               |
|          | -5.644         |                | -2.721        |               |

Table S2. Rovibrational energy levels with  $J \leq 4$  of *ortho*H<sub>2</sub>-CO<sub>2</sub> for CO<sub>2</sub> in its vibrational ground state. Energies are given in cm<sup>-1</sup>. Note that *ortho*H<sub>2</sub>-CO<sub>2</sub> dissociates into the  $j_{\text{H}_2} = 1$  channel, so that states with energies lower than  $2B(\text{H}_2) = 118.644 \text{ cm}^{-1}$  are bound.

| <b>J</b> | <b>Even +1</b> | <b>Even -1</b> | <b>Odd +1</b> | <b>Odd -1</b> |
|----------|----------------|----------------|---------------|---------------|
| <b>0</b> | 72.172         | 93.651         | 46.939        | 67.576        |
|          | 82.951         | 109.418        | 80.807        | 102.472       |
|          | 93.097         |                | 86.855        | 113.653       |
|          | 100.276        |                | 99.545        |               |
|          | 108.919        |                | 105.813       |               |
|          | 112.902        |                | 111.507       |               |
|          | 116.858        |                | 117.429       |               |
| <b>1</b> | 48.098         | 47.562         | 68.338        | 47.981        |
|          | 68.264         | 68.506         | 73.553        | 72.827        |
|          | 83.022         | 73.376         | 87.446        | 81.858        |
|          | 92.803         | 81.739         | 94.343        | 84.977        |
|          | 94.841         | 85.147         | 100.545       | 90.184        |
|          | 102.899        | 89.939         | 101.256       | 94.974        |
|          | 105.121        | 96.781         | 103.778       | 96.542        |
|          | 107.465        | 101.060        | 107.814       | 100.973       |
|          | 111.427        | 103.522        | 111.950       | 103.769       |
|          | 112.129        | 103.642        | 115.889       | 106.127       |
|          | 116.217        | 107.186        | 117.724       | 108.545       |
|          | 117.461        | 109.216        |               | 112.019       |
|          |                | 111.810        |               | 114.697       |
|          |                | 115.223        |               | 115.757       |
|          | 116.652        |                | 117.206       |               |
|          | 117.993        |                | 118.450       |               |
|          | 118.396        |                | 118.585       |               |
| <b>2</b> | 49.108         | 50.712         | 48.784        | 49.456        |
|          | 70.366         | 69.539         | 50.732        | 69.530        |
|          | 74.107         | 75.005         | 70.041        | 70.474        |
|          | 76.557         | 85.178         | 74.486        | 76.540        |
|          | 82.621         | 90.170         | 83.549        | 84.834        |
|          | 87.686         | 95.643         | 83.990        | 90.536        |
|          | 88.374         | 96.956         | 87.058        | 95.824        |
|          | 93.454         | 98.046         | 93.499        | 96.700        |
|          | 96.577         | 102.882        | 94.224        | 103.311       |
|          | 100.524        | 104.162        | 97.807        | 104.220       |
|          | 101.524        | 105.281        | 100.279       | 104.550       |

Table S2. continued.

| <b>J</b> | <b>Even +1</b> | <b>Even -1</b> | <b>Odd +1</b> | <b>Odd -1</b> |
|----------|----------------|----------------|---------------|---------------|
| <b>2</b> | 102.255        | 107.333        | 102.299       | 107.446       |
|          | 103.617        | 109.089        | 104.821       | 108.247       |
|          | 106.709        | 112.585        | 106.386       | 110.054       |
|          | 107.286        | 114.885        | 107.959       | 111.683       |
|          | 109.016        | 115.878        | 109.484       | 114.887       |
|          | 110.386        | 116.634        | 110.169       | 115.508       |
|          | 113.137        |                | 112.311       | 117.409       |
|          | 114.224        |                | 113.567       |               |
|          | 116.733        |                | 114.148       |               |
|          | 118.194        |                | 117.035       |               |
|          |                | 118.010        |               |               |
|          |                | 118.567        |               |               |
| <b>3</b> | 51.481         | 50.572         | 52.566        | 50.784        |
|          | 54.955         | 52.668         | 71.287        | 54.953        |
|          | 71.294         | 72.245         | 73.602        | 72.382        |
|          | 72.795         | 73.641         | 77.168        | 75.945        |
|          | 78.385         | 76.163         | 81.157        | 78.488        |
|          | 87.516         | 81.125         | 86.935        | 84.338        |
|          | 88.414         | 84.589         | 93.639        | 87.073        |
|          | 93.148         | 86.327         | 94.708        | 90.259        |
|          | 97.497         | 89.754         | 97.523        | 91.423        |
|          | 100.887        | 92.317         | 99.858        | 96.964        |
|          | 101.758        | 97.533         | 101.110       | 98.905        |
|          | 102.560        | 97.854         | 105.255       | 98.967        |
|          | 105.101        | 99.664         | 106.090       | 102.217       |
|          | 106.469        | 103.995        | 107.172       | 103.930       |
|          | 107.805        | 104.607        | 108.246       | 105.044       |
|          | 109.382        | 105.939        | 109.643       | 105.600       |
|          | 109.954        | 107.043        | 110.307       | 106.055       |
|          | 111.554        | 107.488        | 112.163       | 107.926       |
|          | 112.917        | 109.629        | 113.016       | 109.668       |
|          | 114.429        | 110.496        | 115.173       | 110.749       |
| 116.181  | 110.938        | 115.982        | 112.430       |               |
| 118.475  | 113.140        |                | 113.816       |               |
|          | 114.193        |                | 114.055       |               |
|          | 115.888        |                | 116.391       |               |
|          | 116.560        |                | 117.585       |               |

Table S2. continued.

| <b>J</b> | <b>Even +1</b> | <b>Even -1</b> | <b>Odd +1</b> | <b>Odd -1</b> |
|----------|----------------|----------------|---------------|---------------|
| <b>4</b> | 53.004         | 55.028         | 52.880        | 54.153        |
|          | 57.444         | 60.718         | 55.310        | 57.459        |
|          | 74.987         | 73.554         | 60.717        | 73.555        |
|          | 78.092         | 76.365         | 74.968        | 75.891        |
|          | 78.303         | 80.018         | 76.592        | 78.113        |
|          | 81.207         | 83.458         | 78.398        | 80.874        |
|          | 86.499         | 89.610         | 83.300        | 86.969        |
|          | 87.115         | 92.706         | 86.286        | 90.295        |
|          | 88.088         | 97.263         | 89.883        | 91.042        |
|          | 93.065         | 98.114         | 91.166        | 96.631        |
|          | 95.764         | 99.783         | 93.305        | 99.472        |
|          | 97.234         | 102.666        | 94.627        | 99.929        |
|          | 101.163        | 105.432        | 100.956       | 104.116       |
|          | 101.925        | 107.132        | 101.919       | 105.855       |
|          | 102.698        | 107.653        | 103.000       | 106.189       |
|          | 104.232        | 108.116        | 104.502       | 107.688       |
|          | 106.191        | 108.753        | 106.224       | 109.346       |
|          | 108.861        | 109.838        | 107.750       | 110.246       |
|          | 109.228        | 112.261        | 109.060       | 111.318       |
|          | 110.018        | 113.038        | 109.185       | 112.150       |
|          | 110.570        | 113.591        | 110.264       | 112.886       |
|          | 111.688        | 114.095        | 111.002       | 114.741       |
|          | 112.430        | 115.452        | 111.780       | 116.182       |
|          | 113.452        | 117.326        | 112.616       | 116.695       |
|          | 114.262        | 117.570        | 114.203       | 117.699       |
